# Supplementary figures and images for: 6-Gingerol as an arginase inhibitor prevents urethane-induced lung carcinogenesis by reprogramming tumor supporting M2 macrophages to M1 phenotype
Source: Royal Society of Chemistry journal article supplement (doi:10.1039/c8fo01147h), 2018-01-01

## Supplemental Figure1

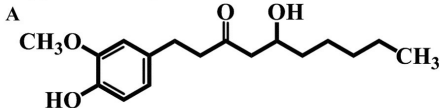

The chemical structure of 6-Gingerol

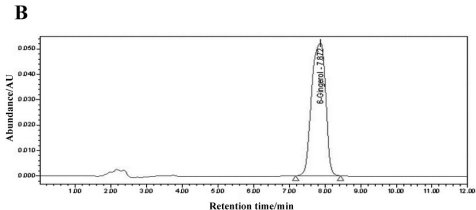

Supplement: c8fo01147h1.pdf [file c8fo01147h1.pdf]
